# Supplementary material for: Hydrogen bonding in microsolvation: photoelectron imaging and theoretical studies on Aux−–(H2O)n and Aux−–(CH3OH)n (x = 1, 2; n = 1, 2) complexes
Source: Royal Society of Chemistry journal article supplement (doi:10.1039/c3cp51851e), 2014-01-01
Supplement: c3cp51851e.pdf [file c3cp51851e.pdf]

*Supporting Information*

**Hydrogen Bonding in Microsolvation: Photoelectron  
Imaging and Theoretical Studies on  $\text{Au}_x^- - (\text{H}_2\text{O})_n$  and  
 $\text{Au}_x^- - (\text{CH}_3\text{OH})_n$  ( $x=1, 2$ ;  $n = 1, 2$ ) Complexes**

Xia Wu,<sup>[a]</sup> Kai Tan,<sup>[b]</sup> and Zichao Tang\*<sup>[a]</sup>, Xin Lu\*<sup>[b]</sup>

<sup>[a]</sup> *State Key Laboratory of Molecular Reaction Dynamics, Dalian Institute of Chemical Physics, Chinese Academy of Sciences, Dalian 116023, China;*

<sup>[b]</sup> *Collabrative Innovation Center of Chemistry for Energy Materials, State Key Laboratory of Physical Chemistry of Solid Surface & Fujian Provincial Key Laboratory of Theoretical and Computational Chemistry, Department of Chemistry, College of Chemistry and Chemical Engineering, Xiamen University, Xiamen 361005, China*

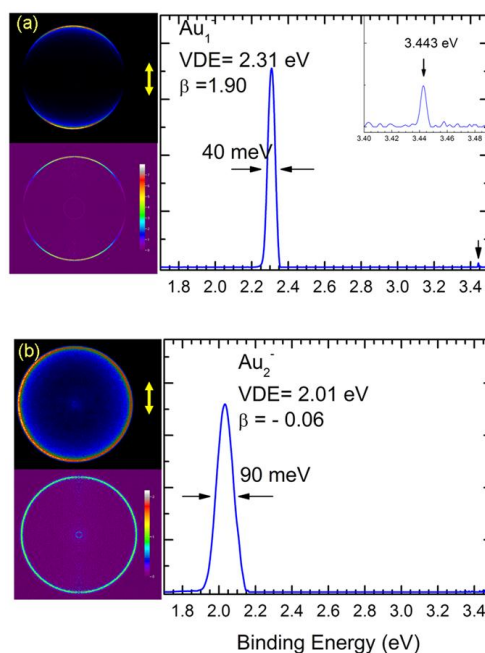

Figure S1 The raw images (top on the left) and the reconstructed (bottom on the left) images and photoelectron spectra of  $\text{Au}_1^-$  and  $\text{Au}_2^-$  taken at 355nm (3.49 eV). The double arrows show the directions of the laser polarization. The number in spectra shows full width of half-maximum (FWHM).

The photoelectron velocity-map images and the photoelectron spectra (PES) of  $\text{Au}^-$  and  $\text{Au}_2^-$  obtained at 355 nm (3.49 eV) are shown in Figure S1. The ground state transitions of  $\text{Au}^-$  and  $\text{Au}_2^-$  located at 2.31 and 2.01 eV are observed. The full width at half-maximum (FWHM) of the ground state transition of  $\text{Au}^-$  is 40 meV, close to our instrumental resolution which is dependent on electron kinetic energy (eKE).

**Table S1** Natural charge of NHBs obtained by NBO analysis (MP2/aug-cc-pVTZ(pp)).

|                                     | X     | H    | O     |
|-------------------------------------|-------|------|-------|
| $\text{Au}^-(\text{H}_2\text{O})$   | -0.95 | 0.49 | -1.00 |
| $\text{Cl}^-(\text{H}_2\text{O})$   | -0.96 | 0.52 | -1.00 |
| $\text{Au}^-(\text{CH}_3\text{OH})$ | -0.92 | 0.49 | -0.84 |
| $\text{Cl}^-(\text{CH}_3\text{OH})$ | -0.95 | 0.52 | -0.84 |

**I.**

Optimized Cartesian Coordinates and binding Energies at the MP2/aug-cc-pVTZ(pp)  
level of theory level of theory

**Au<sup>-</sup>-(H<sub>2</sub>O) isomer 1 E<sub>b</sub> = -14.29 kcal/mol**

|    |           |           |           |
|----|-----------|-----------|-----------|
| Au | 0.354543  | 0.000946  | 0.000000  |
| H  | -1.927313 | -0.275221 | 0.000019  |
| O  | -2.901076 | -0.084660 | -0.000002 |
| H  | -2.872957 | 0.877766  | 0.000004  |

**Au<sup>-</sup>-(H<sub>2</sub>O)<sub>2</sub> isomer 2 E<sub>b</sub> = -29.12 kcal/mol**

|    |           |           |           |
|----|-----------|-----------|-----------|
| Au | -0.154206 | -0.395581 | 0.054124  |
| H  | 0.262924  | 1.960472  | 0.074381  |
| O  | 0.025527  | 2.913013  | 0.043653  |
| H  | -0.931288 | 2.827538  | -0.078299 |
| O  | -2.679799 | 1.527875  | -0.028557 |
| H  | -1.950134 | 0.860899  | -0.171013 |
| H  | -2.741684 | 1.503404  | 0.932994  |

**Au<sup>-</sup>-(CH<sub>3</sub>OH) isomer 3 E<sub>b</sub> = -16.00 kcal/mol**

|    |          |          |         |
|----|----------|----------|---------|
| Au | -0.00049 | 0.00000  | 0.0001  |
| H  | 0.01265  | 0.00000  | 2.18671 |
| O  | 0.25876  | 0.00000  | 3.15568 |
| C  | 1.66969  | 0.00000  | 3.17013 |
| H  | 1.99029  | 0.00000  | 4.21408 |
| H  | 2.08548  | 0.88258  | 2.67341 |
| H  | 2.08548  | -0.88258 | 2.67341 |

**Au<sup>-</sup>-(CH<sub>3</sub>OH)<sub>2</sub> isomer 4a E<sub>b</sub> = -31.02 kcal/mol**

|    |             |             |             |
|----|-------------|-------------|-------------|
| Au | -0.08436476 | -0.34912204 | 0.09200584  |
| H  | 0.36288628  | 1.78041814  | -0.16972179 |
| O  | 0.31269066  | 2.76449112  | -0.31747506 |
| C  | -1.05164283 | 3.02656239  | -0.57390512 |
| H  | -1.17585982 | 4.10964218  | -0.62526307 |
| H  | -1.69792870 | 2.63224328  | 0.21581766  |
| H  | -1.38355216 | 2.59057168  | -1.52207805 |
| H  | 0.63969652  | -0.62334511 | -1.98896016 |
| O  | 0.85354957  | -0.54557440 | -2.95487289 |
| C  | 0.28137228  | 0.68439347  | -3.35862044 |
| H  | 0.57631375  | 0.85852254  | -4.39484220 |
| H  | 0.62827421  | 1.51923581  | -2.74395749 |
| H  | -0.81264701 | 0.66021237  | -3.30809684 |

**Au<sup>-</sup>-(CH<sub>3</sub>OH)<sub>2</sub> isomer 4b E<sub>b</sub> = -29.72 kcal/mol**

|    |             |             |             |
|----|-------------|-------------|-------------|
| Au | 1.03490072  | -0.17743525 | 0.04727870  |
| H  | -0.65237417 | 0.85444929  | -0.61378974 |
| O  | -1.53946069 | 1.34195594  | -0.67814658 |
| C  | -1.69769102 | 1.98305317  | 0.57881475  |
| H  | -2.75870108 | 1.98839368  | 0.83609503  |
| H  | -1.33909292 | 3.01642862  | 0.54190811  |
| H  | -1.13800301 | 1.45055103  | 1.35209132  |
| H  | -2.72100952 | 0.01885099  | -0.68387266 |
| O  | -3.30475161 | -0.75132143 | -0.51391829 |
| C  | -2.59512708 | -1.56680994 | 0.40891424  |
| H  | -2.85510809 | -2.60959071 | 0.21817669  |
| H  | -2.87184713 | -1.32983020 | 1.44298952  |
| H  | -1.51233741 | -1.44380419 | 0.30796491  |

**Au<sub>2</sub><sup>-</sup>-(H<sub>2</sub>O) isomer 5 E<sub>b</sub> = -12.55 kcal/mol**

|    |             |             |             |
|----|-------------|-------------|-------------|
| Au | 1.25970800  | -0.18156500 | 0.00001200  |
| O  | -0.00246400 | 3.00016500  | 0.00000200  |
| H  | 0.73558200  | 2.36800900  | 0.00000900  |
| Au | -1.25947700 | -0.18210200 | -0.00001200 |
| H  | -0.73415100 | 2.36038700  | -0.00000600 |

**Au<sub>2</sub><sup>-</sup>-(H<sub>2</sub>O)<sub>2</sub> isomer 6a E<sub>b</sub> = -24.44 kcal/mol**

|    |           |           |           |
|----|-----------|-----------|-----------|
| Au | 1.112812  | -0.576594 | 0.058444  |
| H  | 0.907314  | 1.671816  | 1.427755  |
| O  | 0.300269  | 2.431158  | 1.434119  |
| H  | 1.154960  | 2.865285  | -0.426042 |
| O  | 1.604778  | 2.649017  | -1.257575 |
| Au | -1.344793 | -0.041792 | -0.086334 |
| H  | -0.483043 | 1.990741  | 1.053138  |
| H  | 1.506873  | 1.683280  | -1.263882 |

**Au<sub>2</sub><sup>-</sup>-(H<sub>2</sub>O)<sub>2</sub> isomer 6b E<sub>b</sub> = -23.83 kcal/mol**

|    |             |             |             |
|----|-------------|-------------|-------------|
| Au | -1.26053000 | 0.00058900  | -0.18202400 |
| Au | 1.26032900  | -0.00059800 | -0.18228600 |
| O  | 0.00336200  | 2.72239600  | 1.50292400  |
| H  | -0.73482100 | 2.17846500  | 1.18443000  |
| O  | -0.00176000 | -2.72238800 | 1.50287400  |
| H  | -0.73715400 | -2.17569400 | 1.18244900  |
| H  | 0.73637100  | -2.17798500 | 1.18507100  |
| H  | 0.73871700  | 2.17587100  | 1.18212800  |

**Au<sub>2</sub><sup>-</sup>-(CH<sub>3</sub>OH) isomer 7 E<sub>b</sub> = -12.52 kcal/mol**

|    |          |          |          |
|----|----------|----------|----------|
| Au | 1.05748  | -0.76101 | 0.20322  |
| Au | -1.28584 | 0.10782  | -0.08678 |
| O  | 2.07651  | 2.32869  | -0.4238  |
| H  | 1.84725  | 1.37764  | -0.34892 |
| C  | 1.06413  | 3.02647  | 0.2836   |
| H  | 1.23674  | 4.09174  | 0.12479  |
| H  | 0.0655   | 2.76138  | -0.07203 |
| H  | 1.10254  | 2.82019  | 1.35744  |

**Au<sub>2</sub><sup>-</sup>-(CH<sub>3</sub>OH)<sub>2</sub> isomer 8a E<sub>b</sub> = -19.42 kcal/mol**

|    |           |           |           |
|----|-----------|-----------|-----------|
| Au | -1.249756 | -0.529637 | 0.154805  |
| Au | 1.245363  | -0.538747 | -0.154860 |
| O  | -1.274198 | 2.250372  | -1.670546 |
| O  | 1.292745  | 2.240305  | 1.671060  |
| H  | -1.308534 | 1.422431  | -1.146865 |
| H  | 1.320649  | 1.412419  | 1.146948  |
| C  | 0.098540  | 2.507883  | -1.932289 |
| H  | 0.138607  | 3.380406  | -2.585360 |
| H  | 0.658792  | 2.722399  | -1.018816 |
| H  | 0.581368  | 1.664628  | -2.431560 |
| C  | -0.077998 | 2.508349  | 1.932348  |
| H  | -0.567796 | 1.668370  | 2.430328  |
| H  | -0.111654 | 3.380441  | 2.586388  |
| H  | -0.636003 | 2.728412  | 1.018792  |

**Au<sub>2</sub><sup>-</sup>-(CH<sub>3</sub>OH)<sub>2</sub> isomer 8b E<sub>b</sub> = -19.04 kcal/mol**

|    |           |           |           |
|----|-----------|-----------|-----------|
| Au | -0.325011 | -1.076533 | -0.058623 |
| H  | -1.255918 | 0.898016  | -0.760830 |
| O  | -1.787968 | 1.726297  | -0.824995 |
| C  | -1.384752 | 2.538520  | 0.273612  |
| H  | -1.825179 | 3.523456  | 0.122544  |
| H  | -0.297124 | 2.619245  | 0.318850  |
| H  | -1.740020 | 2.130822  | 1.224013  |
| H  | -3.529139 | 1.265163  | -0.587606 |
| O  | -4.409948 | 0.945161  | -0.305892 |
| C  | -4.167241 | -0.018843 | 0.705317  |
| H  | -3.339442 | -0.684292 | 0.445504  |
| H  | -5.073974 | -0.611813 | 0.825113  |
| H  | -3.933536 | 0.449951  | 1.667154  |
| Au | 1.640070  | 0.493238  | 0.057595  |

**Cl<sup>-</sup> (H<sub>2</sub>O)**

|    |             |             |             |
|----|-------------|-------------|-------------|
| Cl | -1.12180900 | 0.00490500  | 0.00000100  |
| H  | 1.01650100  | -0.20820600 | 0.00000100  |
| O  | 1.99888200  | -0.09263700 | -0.00000400 |
| H  | 2.06320000  | 0.86591600  | 0.00000500  |

**Cl<sup>-</sup> (CH<sub>3</sub>OH)**

|    |             |             |             |
|----|-------------|-------------|-------------|
| Cl | 1.43797600  | -0.79399200 | 0.00000000  |
| O  | -0.82331400 | 1.28432800  | 0.00000000  |
| C  | -1.88474300 | 0.35784300  | 0.00000000  |
| H  | -2.82097400 | 0.91964900  | 0.00000000  |
| H  | -1.86482100 | -0.28878400 | 0.88281800  |
| H  | -1.86482100 | -0.28878400 | -0.88281800 |
| H  | 0.00000000  | 0.73409100  | 0.00000000  |
